# Supplementary material for: Paramedic experiences of providing care in Wales (UK) during the 2020 COVID-19 pandemic (PECC-19): a qualitative study using evolved grounded theory
Source: HighWire-hosted journal article supplement (doi:10.1136/bmjopen-2021-048677), 2021-06-01
Supplement: bmjopen-2021-048677supp001_data_supplement.pdf [file bmjopen-2021-048677supp001_data_supplement.pdf]

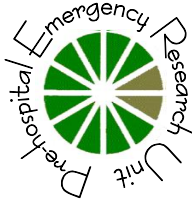

PECC-19 Interview guide V 3.0  
IRAS ID: 282623  
Date:03/04/2020

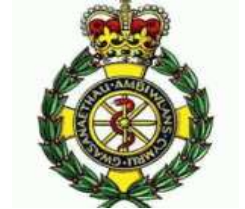

**Paramedic Experiences of providing Care during the  
2020 COVID-19 Pandemic (PECC-19):  
A qualitative study using Grounded Theory  
Interview Guide**

|                                                                                                                                                                                     | Interview Guide                                                                                                                                                                                                                                                                                                                                                                                                                                                                                                                                                                                                                                                                                                                                                                                                                                                                                                                                                                                                                                                                                             |
|-------------------------------------------------------------------------------------------------------------------------------------------------------------------------------------|-------------------------------------------------------------------------------------------------------------------------------------------------------------------------------------------------------------------------------------------------------------------------------------------------------------------------------------------------------------------------------------------------------------------------------------------------------------------------------------------------------------------------------------------------------------------------------------------------------------------------------------------------------------------------------------------------------------------------------------------------------------------------------------------------------------------------------------------------------------------------------------------------------------------------------------------------------------------------------------------------------------------------------------------------------------------------------------------------------------|
| Introduction Key components:<br>Thank you<br>• Your name, purpose, confidentiality, duration, how interview will be conducted, opportunity for questions, signature of consent form | I want to thank you for taking the time to meet with me today. My name is Dr Nigel Rees and we are here to Paramedic experiences of providing care during the 2020 COVID-19 Pandemic.<br><br>Can I confirm that you have read the information sheet and understand the purpose of the research?                                                                                                                                                                                                                                                                                                                                                                                                                                                                                                                                                                                                                                                                                                                                                                                                             |
| Questions:                                                                                                                                                                          | <ol style="list-style-type: none"> <li>1. Can you tell me what you know/understand about COVID-19?</li> <li>2. Tell me about your experiences of providing paramedic care during the COVID-19 Pandemic?</li> <li>3. Have you felt scared or anxious, and has your morale, mental health or wellbeing been affected the COVID-19 Pandemic</li> <li>4. Has the COVID-19 Pandemic impacted on your personal or family life?</li> <li>5. How do you look after yourself following during the COVID-19 Pandemic?</li> <li>6. What are your thoughts of the risk of infection with COVID-19?</li> <li>7. Do you feel you have been provided with adequate training, and equipment for this situation?</li> <li>8. What are your experiences from an occupational health perspective; i.e. assessment, absence, mental health and wellbeing support and pay related issues?</li> <li>9. Do you feel you have been kept informed and updated and supported as the COVID-19 Pandemic has progressed?</li> <li>10. What are your thoughts on the NHS Heroes campaign ongoing during the COVID-19 Pandemic?</li> </ol> |
